# Supplementary material
Source: publisher figshare collection journal article supplement (https://gsajournals.figshare.com/articles/dataset/_/12654188)
Supplement: Supplementary file 1 [file 1]

**Table S1 – RNAi lines tested**

| <b>Gene</b>     | <b>Available Lines</b> | <b>Germline mRNA depletion achieved</b> | <b>Observed phenotype</b>       |
|-----------------|------------------------|-----------------------------------------|---------------------------------|
| <i>CG5003</i>   | v26680                 | 80%                                     | Early embryonic arrest or delay |
|                 | v26679                 | 65%                                     | n.p.*                           |
|                 | BL51408                | 75%                                     | n.p.                            |
|                 | BL31061                | n.d.^                                   | n.p.                            |
|                 | BL51403                | n.d.                                    | n.p.                            |
| <i>Tsp97E</i>   | v109600                | 95%                                     | n.p.                            |
|                 | v4391                  | 95%                                     | n.p.                            |
| <i>CG6966</i>   | v105934                | 65%                                     | n.p.                            |
|                 | BL51409                | 95%                                     | Low penetrance mitotic defect   |
| <i>CG14230</i>  | BL51412                | 93%                                     | Abnormal nurse cell number      |
| <i>stim</i>     | v47073                 | n/a                                     | n.p.                            |
| <i>CG30377</i>  | BL51386                | n.d.                                    | n.p.                            |
| <i>CG14516</i>  | BL35802                | 65%                                     | n.p.                            |
| <i>CBP</i>      | v5680                  | n.d.                                    | n.p.                            |
|                 | v104064                | n.d.                                    | n.p.                            |
| <i>TotC</i>     | v14420                 | 40%                                     | n.p.                            |
|                 | v106379                | 55%                                     | n.p.                            |
|                 | BL51407                | n.d.                                    | n.p.                            |
| <i>CG8188</i>   | v103362                | 85%                                     | n.p.                            |
| <i>CG4991</i>   | v108419                | n.d.                                    | n.p.                            |
|                 | BL44450                | 80%                                     | n.p.                            |
| <i>Nahoda</i>   | v102319                | n.d.                                    | n.p.                            |
|                 | BL51683                | n.d.                                    | n.p.                            |
| <i>Itp-r83A</i> | v6484                  | n.d.                                    | n.p.                            |
|                 | BL51686                | 50%                                     | n.p.                            |
| <i>Rcal</i>     | BL51680                | n.d.                                    | n.p.                            |
|                 | BL51450                | n.d.                                    | n.p.                            |
| <i>CG7730</i>   | BL36851                | 98%                                     | n.p.                            |
| <i>Fur2</i>     | BL51743                | 92%                                     | n.p.                            |
|                 | BL42577                | 80%                                     | n.p.                            |
| <i>CG11151</i>  | BL51413                | 97%                                     | n.p.                            |
| <i>CG17018</i>  | BL57024                | n.d.                                    | n.p.                            |
| <i>Crag</i>     | BL33594                | n.d.                                    | n.p.                            |
| <i>CAH2</i>     | BL41836                | 44%                                     | n.p.                            |
| <i>lin19</i>    | BL36601                | 94%                                     | n.p.                            |

|                  |         |      |                               |
|------------------|---------|------|-------------------------------|
| <i>kdm4A</i>     | BL34629 | n/a  | n.p.                          |
| <i>RAF2</i>      | BL34395 | 94%  | n.p.                          |
| <i>pzg</i>       | BL35448 | 75%  | n.p.                          |
| <i>CG17528</i>   | BL26292 | 9%   | n.p.                          |
|                  | BL51404 | 55%  | n.p.                          |
| <i>CG7840</i>    | BL34954 | n/a  | n.p.                          |
|                  | BL32379 | 7%   | n.p.                          |
| <i>NaPi-III</i>  | BL29408 | 90%  | Abnormal embryonic divisions  |
| <i>CG7627</i>    | BL32337 | 38%  | n.p.                          |
|                  | BL51679 | 23%  | n.p.                          |
| <i>CG4476</i>    | BL38930 | n.d. | n.p.                          |
| <i>M1BP</i>      | BL32858 | 60%  | n.p.                          |
| <i>CG10254</i>   | BL51687 | n.d. | n.p.                          |
|                  | v108657 | n.d. | n.p.                          |
| <i>mod(mdg4)</i> | BL33907 | n.d. | Abnormal embryonic divisions  |
|                  | BL32995 | n.d. | Abnormal embryonic divisions  |
| <i>CG6962</i>    | BL51682 | 98%  | n.p.                          |
| <i>CG6927</i>    | BL51684 | 90%  | Low penetrance mitotic defect |
|                  | BL42001 | n.d. | n.p.                          |
| <i>CG7777</i>    | BL44464 | 50%  | n.p.                          |
|                  | BL50695 | 50%  | n.p.                          |
| <i>fzr2</i>      | BL38223 | 88%  | n.p.                          |
| <i>CG2924</i>    | v104482 | n.d. | n.p.                          |
| <i>sip2</i>      | BL33691 | n.d. | n.p.                          |
| <i>tlk</i>       | BL35298 | 63%  | n.p.                          |
| <i>ATPalpha</i>  | BL32913 | n.d. | n.p.                          |
|                  | BL33646 | n.d. | n.p.                          |
|                  | BL51411 | n.d. | n.p.                          |
| <i>mCherry</i>   | BL35785 | -    | -                             |

\*No observable phenotype (n.p.)

^No data (n.d.)

**Table S2 – Transposable element insertion lines tested**

| Gene           | Tested lines | Associated allele                | Observed phenotype                 |
|----------------|--------------|----------------------------------|------------------------------------|
| <i>CG5003</i>  | BL18566      | <i>CG5003<sub>f02616</sub></i>   | Early embryonic arrest or delay    |
|                | BL22065      | <i>CG5003<sub>DP01070</sub></i>  |                                    |
| <i>Tsp97E</i>  | BL37653      | <i>Tsp97E<sub>MI04380</sub></i>  | n.p.*                              |
| <i>CG30377</i> | BL19152      | <i>CG30377<sub>d00826</sub></i>  | Eggs not fertilized                |
|                | BL30598      | <i>CG30377<sub>MI00023</sub></i> |                                    |
|                | BL43832      | <i>CG30377<sub>MI07499</sub></i> |                                    |
| <i>CG17734</i> | BL19856      | <i>CG17734<sub>EY06693</sub></i> | n.p.                               |
| <i>CG4586</i>  | BL18419      | <i>CG4586<sub>f01234</sub></i>   | n.p.                               |
| <i>CG4991</i>  | BL24186      | <i>CG4991<sub>MB03239</sub></i>  | n.p.                               |
| <i>Rca1</i>    | BL9162       | <i>Rca1<sub>IX</sub></i>         | Low penetrance embryonic phenotype |
|                | BL11294      | <i>Rca1<sub>03300</sub></i>      |                                    |
| <i>Fur2</i>    | BL11429      | <i>Fur2<sub>EP1493</sub></i>     | n.p.                               |
|                | BL57092      | <i>Fur2<sub>A</sub></i>          |                                    |
| <i>koko</i>    | BL6962       | <i>koko<sub>ED2</sub></i>        | n.p.                               |
|                | BL21798      | <i>koko<sub>DP00113</sub></i>    |                                    |
| <i>yin</i>     | BL32630      | <i>yin<sub>G10332</sub></i>      | n.p.                               |
|                | BL19172      | <i>yin<sub>d02176</sub></i>      |                                    |
| <i>CG15570</i> | BL43789      | <i>CG15570<sub>MI06763</sub></i> | Abnormal nurse cell number         |
| <i>WRNexo</i>  | BL18267      | <i>WRNexo<sub>e04496</sub></i>   | n.p.                               |
| <i>Fas1</i>    | BL36987      | <i>Fas1<sub>MI03699</sub></i>    | n.p.                               |
|                | BL21537      | <i>Fas1<sub>DG16410</sub></i>    |                                    |
|                | BL19855      | <i>Fas1<sub>EY0662</sub></i>     |                                    |
| <i>CG17018</i> | BL57930      | <i>CG17018<sub>MI12332</sub></i> | n.p.                               |
| <i>CAH2</i>    | BL42463      | <i>CAH2<sub>MI07079</sub></i>    | Early embryonic arrest or delay    |
|                | BL25562      | <i>CAH2<sub>MB07616</sub></i>    |                                    |
| <i>cue</i>     | BL24077      | <i>cue<sub>MB03598</sub></i>     | n.p.                               |
|                | BL655        | <i>cue<sub>2</sub></i>           |                                    |
|                | BL15336      | <i>cue<sub>EY01263</sub></i>     |                                    |
| <i>mei-P26</i> | BL25717      | <i>mei-P26<sub>mfs2</sub></i>    | Arrest in early oogenesis          |
|                | BL25919      | <i>mei-P26<sub>mfs1</sub></i>    |                                    |
| <i>CG6178</i>  | BL13992      | <i>CG6178<sub>KG05318</sub></i>  | n.p.                               |
|                | BL17104      | <i>CG6178<sub>EP3251</sub></i>   |                                    |
|                | BL17388      | <i>CG6178<sub>EY0763</sub></i>   |                                    |
| <i>CG15721</i> | BL25490      | <i>CG15721<sub>MB06259</sub></i> | n.p.                               |
|                | BL18718      | <i>CG15721<sub>f03962</sub></i>  |                                    |

|                 |         |                                    |                                          |
|-----------------|---------|------------------------------------|------------------------------------------|
| <i>NaPi-III</i> | BL24722 | <i>NaPi-III</i> <sub>MB04559</sub> | Abnormal embryonic divisions             |
| <i>CG7627</i>   | BL18426 | <i>CG7627</i> <sub>f01338</sub>    | n.p.                                     |
| <i>CG4476</i>   | BL19350 | <i>CG4479</i> <sub>d11470</sub>    | Low penetrance embryonic arrest or delay |
|                 | BL30944 | <i>CG4476</i> <sub>MI00100</sub>   |                                          |
| <i>CG10960</i>  | BL37000 | <i>CG10960</i> <sub>MI03549</sub>  | Abnormal embryonic divisions             |
|                 | BL24047 | <i>CG10960</i> <sub>MB03129</sub>  |                                          |

\*No observable phenotype (n.p.)

**Table S3 – Glycogen pathway enzyme gene RNAi lines tested**

| <b>Gene</b>                                               | <b>RNAi lines Tested</b> |
|-----------------------------------------------------------|--------------------------|
| <i>Trehalase (Treh)</i>                                   | BL50585                  |
| <i>Hexokinase C (HK)</i>                                  | BL57404                  |
| <i>Phosphoglucosemutase (Pgm)</i>                         | BL34345                  |
| <i>UTP--glucose-1-phosphate uridylyltransferase (UGP)</i> | BL50902                  |
|                                                           | BL52968                  |
| <i>Glycogenin</i>                                         | BL42565                  |
| <i>Glycogen synthase (GlyS)</i>                           | BL34930                  |
|                                                           | BL50956                  |
| <i>1,4-Alpha-Glucan Branching Enzyme (AGBE)</i>           | BL40860                  |
|                                                           | BL42753                  |
| <i>Glycogen phosphorylase (GlyP)</i>                      | BL33634                  |

A

*nebu* RNAi

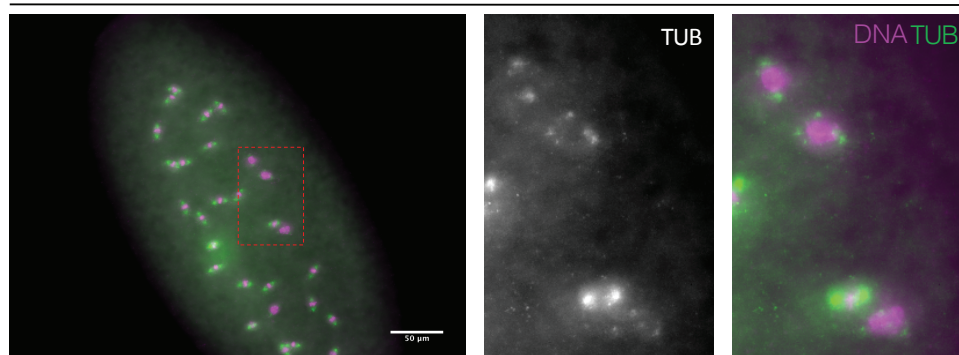

B

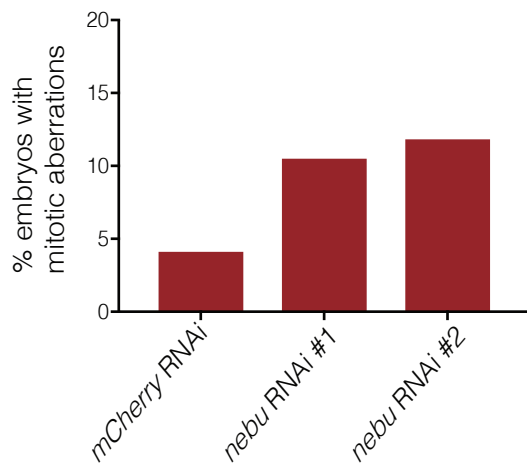

C

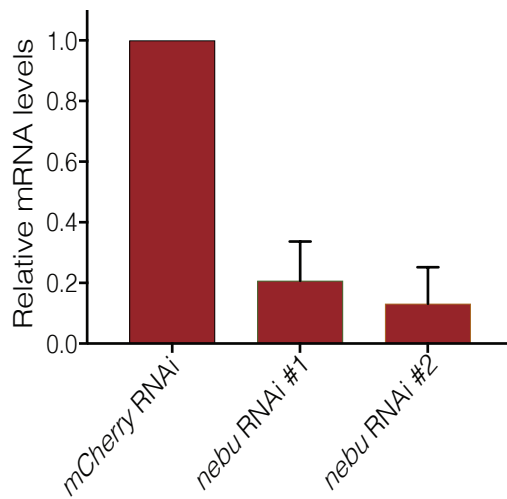

**Figure S1. *nebu* RNAi recapitulates the *nebu* mutant embryonic phenotype.** RNAi against *nebu* was driven during late oogenesis using a *mat $\alpha$ -GAL4* driver, also driving expression of *UAS-Dicer2*. (A) Defects in mitosis were observed in *nebu* RNAi embryos; multipolar spindles and seemingly polyploid nuclei (insets) were present as in embryos from mothers with the transposon insertion alleles of *nebu*. DNA is shown in magenta, and anti-tubulin is shown in green. (B) Embryos from two different *nebu* RNAi lines exhibit mitotic defects (10.5% and 11.9%, respectively), whereas only 4.2% of a *mCherry* RNAi control showed mitotic defects. The difference between the observed phenotypic frequency in *nebu* RNAi and control was significant (Binomial test,  $p < 0.0001$ ). (C) Q-PCR analysis of mature oocyte samples shows depletion of *nebu* mRNA in *nebu* RNAi lines relative to an *mCherry* control, with greater than 75% of total *nebu* mRNA being depleted in both lines (mRNA reduced to  $20.7 \pm 12.9\%$  of control for *nebu* RNAi #1 and  $13.1 \pm 12.10\%$  for *nebu* RNAi #2).

A

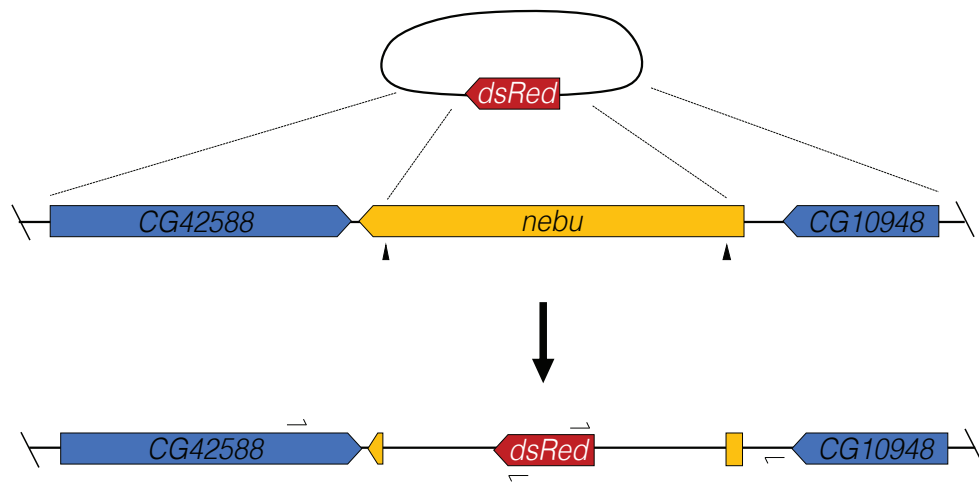

B

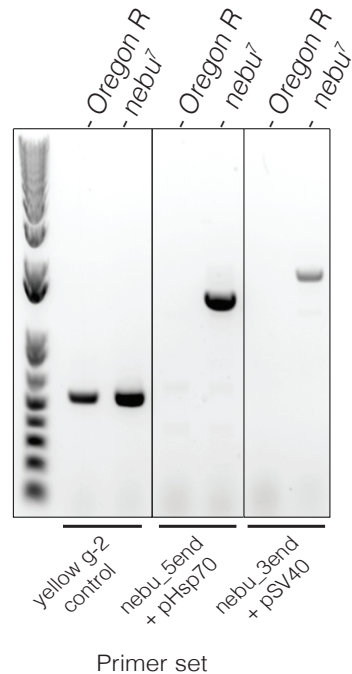



**Figure S2. Generation of a *nebu* null allele by CRISPR-mediated deletion.** (A) *nebu* CRISPR deletion strategy. We generated gRNAs targeting the ends of the *nebu* locus. To induce homology-directed repair, we co-injected the gRNA plasmids with a donor plasmid carrying a *dsRED* marker and two homology arms to the regions immediately outside the gRNA target sites. (B) PCR confirmation of *nebu* CRISPR deletion. Primers sets used were designed to span the junction between the *dsRED* marker and the flanking genomic region.

A

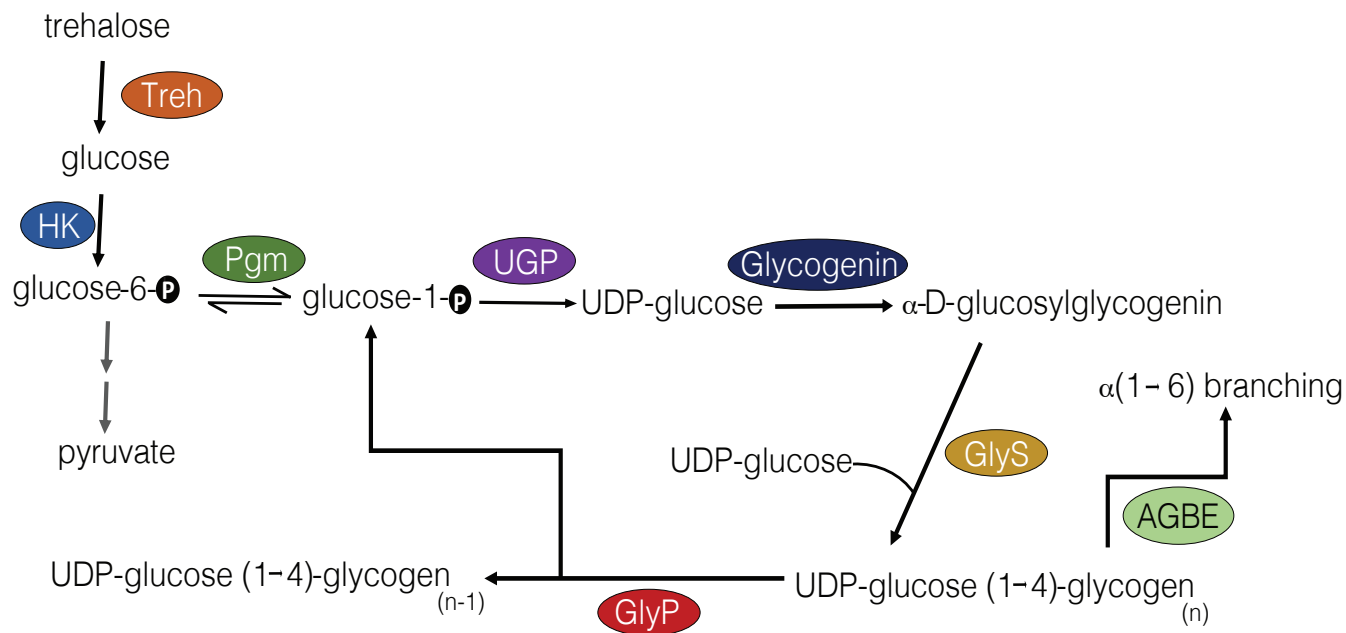

B

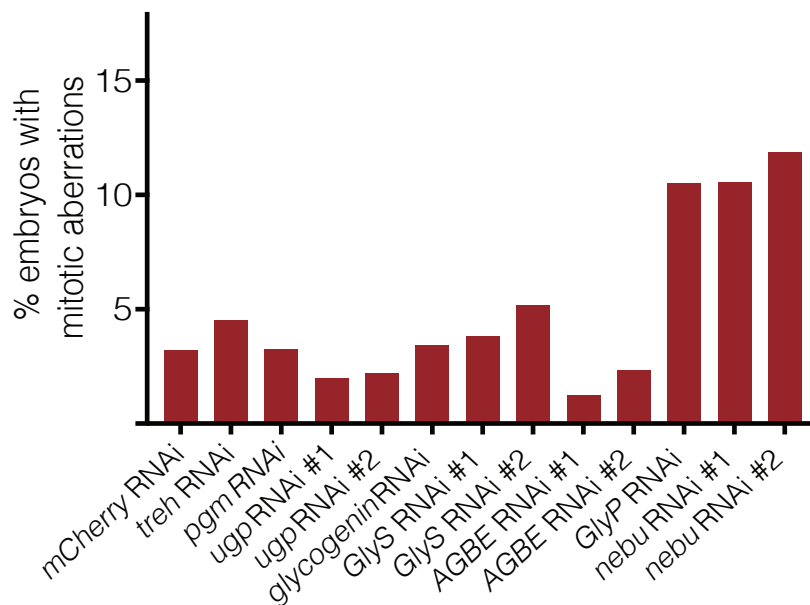

**Figure S3. Disruption of glycogen metabolic enzyme leads to mitotic defects in early embryogenesis.** (A) Schematic of the glycogen metabolic pathway. Once glucose is converted into glucose-6-phosphate by hexokinase C (HK), it can enter glycolysis and produce pyruvate, or it can be converted into glucose-1-phosphate by phosphoglucomutase (Pgm). UTP-glucose-1-phosphate uridylyltransferase (UGP) converts glucose-1-phosphate into UDP-glucose, which is then used by glycogenin to produce  $\alpha$ -D-glucosylglycogenin, which is used by glycogen synthase (GlyS) to kick start glycogen production. GlyS then produces UDP-glucose  $\alpha(1\rightarrow4)$ -glycogenin (linear glycogen) by subsequent addition of UDP-glucose monomers. Branching in the glycogen polymer can be catalyzed by 1,4-alpha-glucan branching enzyme (AGBE) which produces  $\alpha(1\rightarrow6)$  branching. Glycogen phosphorylase is the main catalytic enzyme in glycogen breakdown, catalyzing the production of glucose-1-phosphate from a glycogen polymer. The released glucose-1-phosphate can be either reused for glycogen synthesis or feed into glycolysis. (B) Quantification of embryonic phenotype in knockdown of glycogen metabolic enzymes. RNAi against different enzymes of the glycogen pathway was driven with *mat $\alpha$ -GAL4* germline driver, also driving expression of *UAS-Dicer2*, and 2-hour embryos were collected, fixed and stained for DNA and tubulin. The fraction of embryos with mitotic defects are shown out of the total number of collected, and mitotic defects refer to arrested or delayed mitoses, and multipolar spindles. *GlyP* RNAi embryos exhibited mitotic phenotypes at a significantly different frequency than in the *mCherry* RNAi control (Binomial test,  $p < 0.0001$ ), and was comparable to the frequency observed in *nebu* RNAi.

A

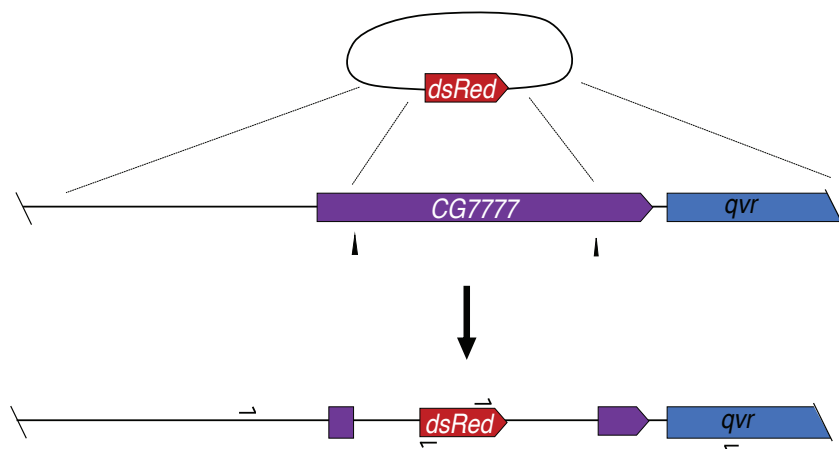

B

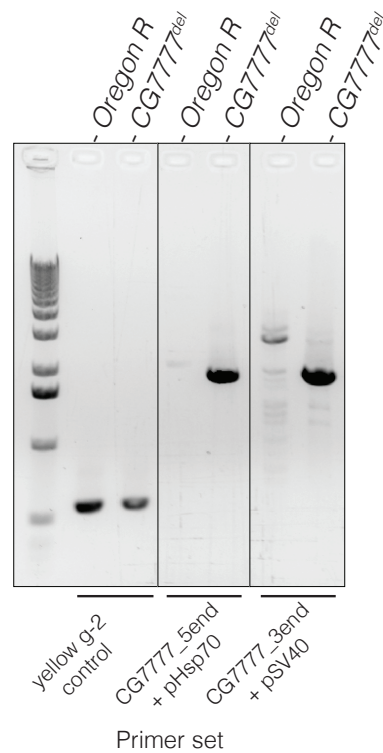

C

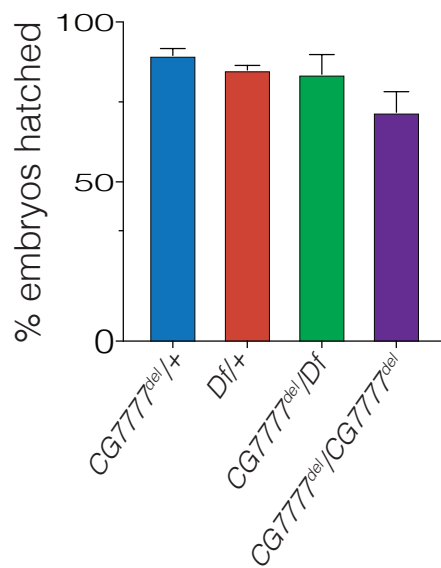

**Figure S4. CG7777 is dispensable for female fertility.** (A) CRISPR deletion of *CG7777*. We generated gRNAs targeting the ends of the *CG7777* locus. To induce homology-directed repair, we co-injected the gRNA plasmids with a donor plasmid carrying a *dsRED* marker and two homology arms to the regions immediately outside the gRNA target sites. (B) PCR confirmation of *CG7777* CRISPR deletion. Primers sets used were designed to span the junction between the *dsRED* marker and the flanking genomic region. (C) Hatching assay analysis of eggs laid by *CG7777* null females. Only the difference between *CG7777<sub>del</sub>/CG7777<sub>del</sub>* and *CG7777<sub>del</sub>/+* is significant (two-tailed t-test,  $p < 0.05$ ).
